# Supplementary material
Source: publisher site journal article supplement (https://www.spandidos-publications.com/1919/downloadSupplementary)

Figure S1. Transfection efficiencies and treatments. (A) Transfection efficiency of miR-181d mimic. (B) Transfection efficiency of miR-181d inhibitor. (C) Effect of PI3K/AKT inhibitor. (D) Effect of IGF1 inhibitor. \*\*\*P<0.001 vs. negative control. miR, microRNA; IGF1, Insulin like growth factor 1.

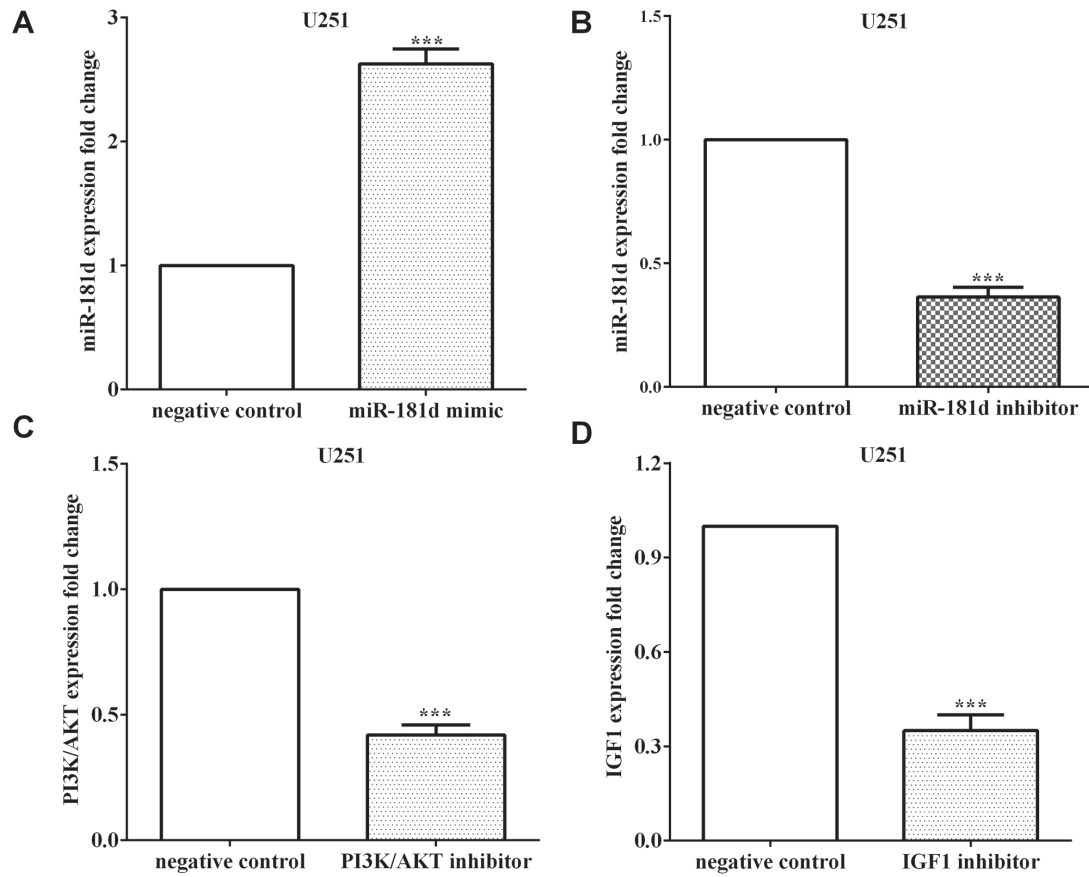

Figure S2. Changes in the maximum diameter of the tumor.  
\*P<0.05, \*\*P<0.01 vs. negative control. IGF1, Insulin like growth factor 1; miR, microRNA.

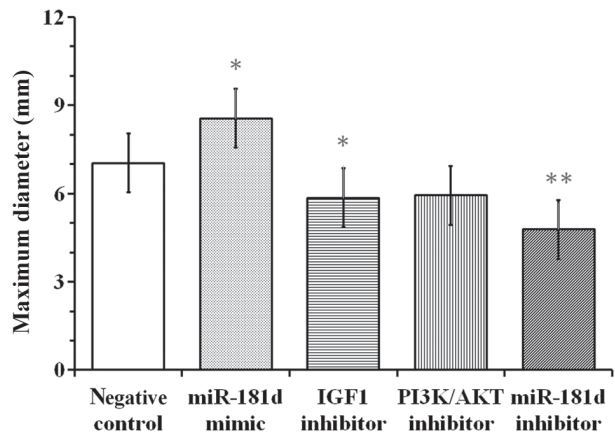

Supplement: Supplementary file 1 [file downloadSupplementary]
